# Supplementary material
Source: publisher figshare collection journal article supplement (https://plos.figshare.com/articles/dataset/_/7959677)
Supplement: Supplementary file 1 [file 1]

Archive with 17 entries (17 files):
- pone.0214155.s001.pdf
- pone.0214155.s002.pdf
- pone.0214155.s003.pdf
- pone.0214155.s004.pdf
- pone.0214155.s005.pdf
- pone.0214155.s006.pdf
- pone.0214155.s007.pdf
- pone.0214155.s008.pdf
- pone.0214155.s009.pdf
- pone.0214155.s010.pdf
- pone.0214155.s011.pdf
- pone.0214155.s012.pdf
- pone.0214155.s013.pdf
- pone.0214155.s014.pdf
- pone.0214155.s015.pdf
- pone.0214155.s016.pdf
- pone.0214155.s017.pdf
