# Supplementary material
Source: publisher figshare collection journal article supplement (https://plos.figshare.com/articles/dataset/_/7959677)
Supplement: Supplementary file 1 [file 1 › pone.0214155.s001.pdf]

Figure S1: Average Judge Ranking by Induced and Self-Selected Samples

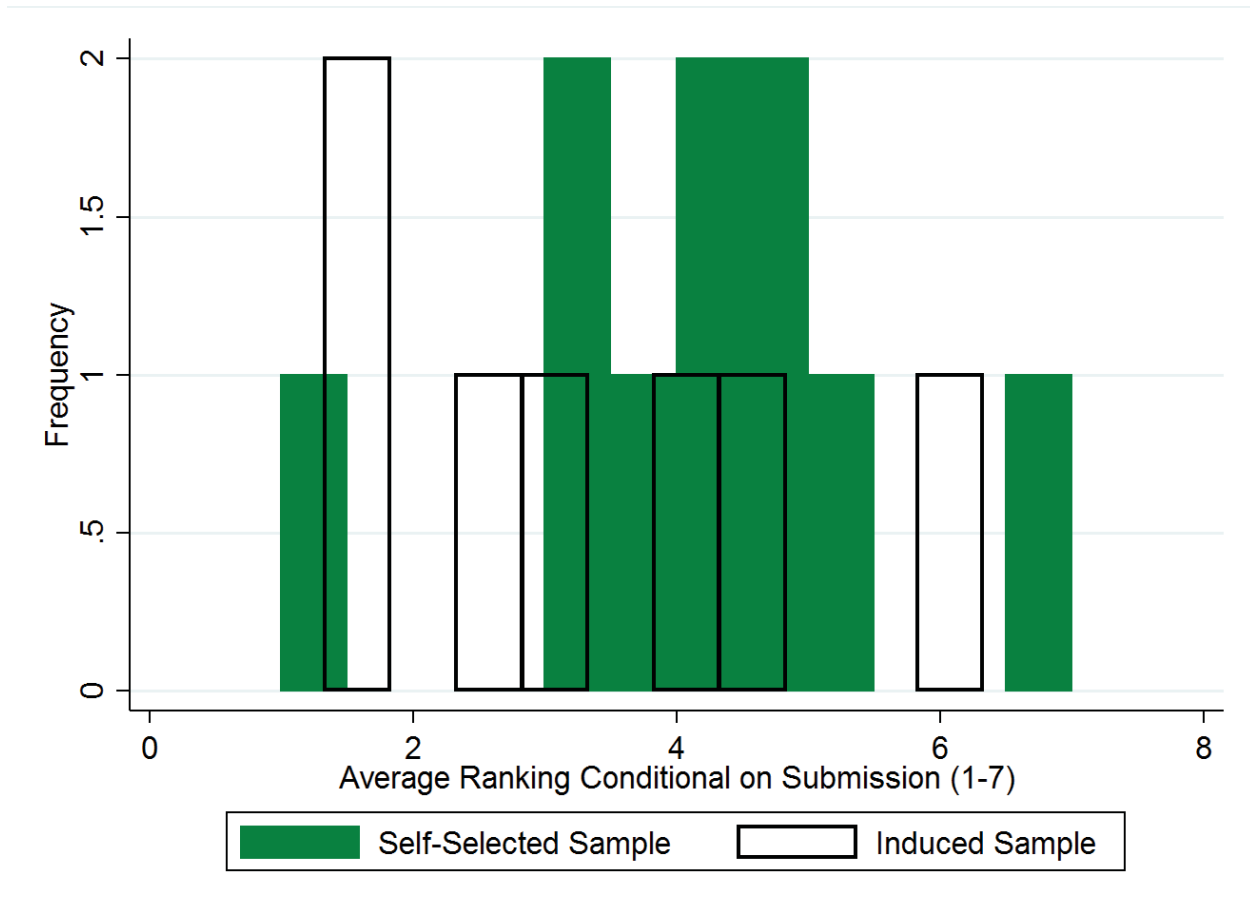

Notes: The figure compares the distribution of contest performance across the induced and self-selected sample. Average ranking is equal to the average rank assigned to the project by the three judges assigned to the project for participants who submitted a project for judgment, and zero for those who did not. Each judge scored 7 projects, so this measure ranges from 7 as the highest rank to 1 as the lowest.
