# Supplementary material
Source: publisher figshare collection journal article supplement (https://plos.figshare.com/articles/dataset/_/7959677)
Supplement: Supplementary file 1 [file 1 › pone.0214155.s005.pdf]

## Post-Contest Survey

### UCSD Application Student Innovation Contest Post-Contest Participant Survey

\* Required

1. Why did you not sign up for the contest until you received the \$100 gift card offer to sign up? \*

\*

Mark only one oval.

- ☐ I was not aware of the contest until I was notified that I had been randomly selected to receive \$100 for participating
- ☐ I forgot to sign up before the initial contest deadline
- ☐ I did not think that I had time to participate
- ☐ I did not think that I had the abilities required to participate in the innovation contest
- ☐ I did not think the innovation contest was interesting or worth my time
- ☐ Other: \_\_\_\_\_

2. Did you spend any time working on a solution for the innovation contest problem? \*

Mark only one oval.

- ☐ Yes      Skip to question 4.
- ☐ No

3. Why didn't you spend any time working on a solution for the innovation contest problem? Check all options that apply.

Check all that apply.

- ☐ Classes took too much of my time
- ☐ Work took too much of my time
- ☐ My social life took too much of my time
- ☐ I didn't know how to begin working on the problem
- ☐ I didn't have any ideas about how to solve the problem
- ☐ I never intended to spend any time on the contest
- ☐ I didn't think the contest problem was interesting enough to work on
- ☐ Other: \_\_\_\_\_

Skip to question 6.

4. Did you submit a project for consideration by the contest judges? \*

Mark only one oval.

- ☐ Yes      Skip to question 6.
- ☐ No

5. Why didn't you submit a project for consideration by the judges? Check all options that apply \*

Check all that apply.

- ☐ Project proved harder than I expected and I did not have enough time to finish it
- ☐ I had more school work than expected and I did not have enough time to finish my project
- ☐ I didn't think my solution was good enough to submit
- ☐ I was worried about the judges thinking poorly of my submission
- ☐ I didn't know how to submit my project
- ☐ I forgot when the deadline for submissions was
- ☐ I lost interest in the contest
- ☐ Other

6. Do you think you made the right decision by signing up to participate in the UCSD Student Innovation contest? \*

Mark only one oval.

- ☐ Yes
- ☐ No

7. Did the check-in emails you received from contest organizers have any of the following impacts? Check all that apply \*

Check all that apply.

- ☐ They reminded me to work on the project
- ☐ They provided me with useful information on how to work on the project
- ☐ They made me feel more confident about my ability to do a good job
- ☐ They made me feel less confident about my ability to do a good job
- ☐ They annoyed me or wasted my time
- ☐ They made me feel less motivated to work on the project
- ☐ They made me feel more motivated to work on the project
- ☐ They made me feel supported by the contest organizers
- ☐ They had no impact on me
- ☐ Other: \_\_\_\_\_

8. How would you rate your experience with the UCSD Student Innovation contest? \*

Mark only one oval.

|                 |                       |                       |                       |                       |                       |                 |
|-----------------|-----------------------|-----------------------|-----------------------|-----------------------|-----------------------|-----------------|
|                 | 1                     | 2                     | 3                     | 4                     | 5                     |                 |
| Very negatively | <input type="radio"/> | Very positively |

9. Will you consider participating in another innovation contest? \*

Mark only one oval.

- ☐ Yes  
☐ No  
☐ Maybe

10. How could we improve the contest going forward? \*

---

---

---

---

---

**Please provide your contact information so that you can be included in the draw to win one of 50 \$100 Visa Gift Cards**

11. Last Name

---

12. First Name

---

13. UCSD Email Address

---

---

Notes: Question 1 was only included in the survey given to the induced population. Question 7 was only included in the survey given to the encouraged population.
