# Supplementary material
Source: publisher figshare collection journal article supplement (https://plos.figshare.com/articles/dataset/_/7959677)
Supplement: Supplementary file 1 [file 1 › pone.0214155.s006.pdf]

**Table S1: Difference in Outcomes for Induced and Self-Selected Innovators**

|              | (1)                | (2)                | (3)               | (4)               | (5)               | (6)                       |
|--------------|--------------------|--------------------|-------------------|-------------------|-------------------|---------------------------|
|              | Submission         |                    | Average Ranking   |                   | Average Ranking   | Conditional on Submitting |
| Induced      | -0.017<br>(0.0418) | -0.024<br>(0.0475) | -0.126<br>(0.170) | -0.190<br>(0.191) | -0.732<br>(0.806) | -0.527<br>(0.846)         |
| Controls     | No                 | Yes                | No                | Yes               | No                | Yes                       |
| Observations | 190                | 172                | 190               | 172               | 17                | 17                        |
| R-squared    | 0.001              | 0.025              | 0.003             | 0.046             | 0.052             | 0.404                     |
| Mean dep var | 0.090              | 0.090              | 0.510             | 0.510             | 2.824             | 2.824                     |

Notes: Standard errors are in parentheses. Columns 2, 4, and 6 include controls for participant gender, CGPA, year of study, whether or not they major in computer science or electrical engineering, and whether or not they have prior innovation contest experience. \* significant at 10%; \*\* significant at 5%; \*\*\* significant at 1%
