# Supplementary material
Source: publisher figshare collection journal article supplement (https://plos.figshare.com/articles/dataset/_/7959677)
Supplement: Supplementary file 1 [file 1 › pone.0214155.s007.pdf]

**Table S2: Effect of Encouragement Treatment on Contest Outcomes**

|               | (1)<br>Submission | (2)               | (3)<br>Average Ranking | (4)<br>Average Ranking | (5)<br>Average Ranking<br>Conditional on Submitting | (6)<br>Average Ranking<br>Conditional on Submitting |
|---------------|-------------------|-------------------|------------------------|------------------------|-----------------------------------------------------|-----------------------------------------------------|
| Encouragement | -0.028<br>(0.042) | -0.020<br>(0.047) | -0.075<br>(0.169)      | -0.014<br>(0.190)      | 0.322<br>(0.824)                                    | 0.425<br>(0.948)                                    |
| Controls      | No                | Yes               | No                     | Yes                    | No                                                  | Yes                                                 |
| Observations  | 190               | 172               | 190                    | 172                    | 17                                                  | 17                                                  |
| R-squared     | 0.002             | 0.025             | 0.001                  | 0.040                  | 0.010                                               | 0.393                                               |
| Mean dep var  | 0.0895            | 0.0895            | 0.510                  | 0.510                  | 2.824                                               | 2.824                                               |

Notes: Standard errors are in parentheses. Columns 2, 4, and 6 include controls for participant gender, cgpa, year of study, whether or not they major in computer science or electrical engineering, and whether or not they have prior innovation contest experience. \* significant at 10%; \*\* significant at 5%; \*\*\* significant at 1%
