# Supplementary material
Source: publisher figshare collection journal article supplement (https://plos.figshare.com/articles/dataset/_/7959677)
Supplement: Supplementary file 1 [file 1 › pone.0214155.s008.pdf]

**Table S3: Difference in Outcomes for Induced and Self-Selected Innovators by Gender**

|              | (1)<br>Submission | (2)<br>Average Ranking | (3)<br>Average Ranking<br>Conditional on Submitting |
|--------------|-------------------|------------------------|-----------------------------------------------------|
| Induced      | -0.011<br>(0.052) | -0.087<br>(0.212)      | -0.607<br>(1.002)                                   |
| Female       | 0.024<br>(0.065)  | 0.276<br>(0.265)       | 1.643<br>(1.103)                                    |
| Inducedmed * | -0.023<br>(0.090) | -0.203<br>(0.366)      | -0.783<br>(1.645)                                   |
| Female       |                   |                        |                                                     |
| Observations | 190               | 190                    | 17                                                  |
| R-squared    | 0.002             | 0.009                  | 0.216                                               |
| Mean dep var | 0.0895            | 0.332                  | 3.715                                               |

Notes: Standard errors are in parentheses. \* significant at 10%; \*\* significant at 5%; \*\*\* significant at 1%
