# Supplementary material
Source: publisher figshare collection journal article supplement (https://plos.figshare.com/articles/dataset/_/7959677)
Supplement: Supplementary file 1 [file 1 › pone.0214155.s009.pdf]

**Table S4: Effects of Encouragement on Contest Outcomes by Gender**

|                | (1)<br>Submission | (2)<br>Average Ranking | (3)<br>Average Ranking<br>Conditional on Submitting |
|----------------|-------------------|------------------------|-----------------------------------------------------|
| Encouragement  | 0.009<br>(0.051)  | 0.046<br>(0.207)       | 0.189<br>(0.909)                                    |
| Female         | 0.057<br>(0.060)  | 0.289<br>(0.246)       | 0.767<br>(0.949)                                    |
| Encouragement* | -0.111<br>(0.089) | -0.337<br>(0.363)      | 2.845<br>(1.878)                                    |
| Female         |                   |                        |                                                     |
| Observations   | 190               | 190                    | 17                                                  |
| R-squared      | 0.011             | 0.009                  | 0.309                                               |
| Mean dep var   | 0.0895            | 0.332                  | 3.715                                               |

Notes: Standard errors are in parentheses. \* significant at 10%; \*\* significant at 5%; \*\*\* significant at 1%
