# Supplementary material
Source: publisher figshare collection journal article supplement (https://plos.figshare.com/articles/dataset/_/7959677)
Supplement: Supplementary file 1 [file 1 › pone.0214155.s010.pdf]

**Table S5: Alternate Measures of Performance**

|               | (1)<br>Average<br>Ranking (IHS) | (2)<br>Average<br>Normalized Score | (3)<br>Average Normalized Score<br>Conditional on Submitting | (4)<br>Average Normalized<br>Score (IHS) |
|---------------|---------------------------------|------------------------------------|--------------------------------------------------------------|------------------------------------------|
| Induced       | -0.098<br>(0.128)               | -0.084<br>(0.134)                  | -0.327<br>(0.773)                                            | -0.059<br>(0.091)                        |
| Encouragement | -0.028<br>(0.128)               | -0.031<br>(0.133)                  | 0.473<br>(0.773)                                             | -0.013<br>(0.091)                        |
| Observations  | 190                             | 190                                | 17                                                           | 190                                      |
| R-squared     | 0.003                           | 0.002                              | 0.047                                                        | 0.002                                    |
| Mean dep var  | 0.582                           | 0.253                              | 2.824                                                        | 0.510                                    |

Notes: Standard errors are in parentheses. \* significant at 10%; \*\* significant at 5%; \*\*\* significant at 1%
