# Supplementary material
Source: publisher figshare collection journal article supplement (https://plos.figshare.com/articles/dataset/_/7959677)
Supplement: Supplementary file 1 [file 1 › pone.0214155.s011.pdf]

**Table S6: Interaction between Induced Innovators & Encouragement Treatment**

|                           | (1)<br>Submission | (2)               | (3)<br>Average Ranking | (4)<br>Average Ranking | (5)<br>Average Ranking<br>Conditional on Submitting | (6)               |
|---------------------------|-------------------|-------------------|------------------------|------------------------|-----------------------------------------------------|-------------------|
| Induced                   | 0.019<br>(0.059)  | 0.016<br>(0.066)  | 0.031<br>(0.238)       | -0.019<br>(0.267)      | -0.367<br>(1.099)                                   | -0.253<br>(1.180) |
| Encouragement             | 0.006<br>(0.057)  | 0.018<br>(0.064)  | 0.071<br>(0.230)       | 0.151<br>(0.259)       | 0.501<br>(1.099)                                    | 0.683<br>(1.308)  |
| Encouragement*<br>Induced | -0.073<br>(0.084) | -0.079<br>(0.093) | -0.318<br>(0.340)      | -0.344<br>(0.374)      | -0.902<br>(1.823)                                   | -0.729<br>(2.053) |
| Controls                  | No                | Yes               | No                     | Yes                    | No                                                  | Yes               |
| Observations              | 190               | 172               | 190                    | 172                    | 17                                                  | 17                |
| R-squared                 | 0.007             | 0.030             | 0.009                  | 0.051                  | 0.072                                               | 0.424             |
| Mean dep var              | 0.0895            | 0.0895            | 0.510                  | 0.510                  | 2.824                                               | 2.824             |

Notes: Standard errors are in parentheses. Columns 2, 4, and 6 include controls for participant gender, cgpa, year of study, whether or not they major in computer science or electrical engineering, and whether or not they have prior innovation contest experience. \* significant at 10%; \*\* significant at 5%; \*\*\* significant at 1%
