# Supplementary material
Source: publisher figshare collection journal article supplement (https://plos.figshare.com/articles/dataset/_/7959677)
Supplement: Supplementary file 1 [file 1 › pone.0214155.s012.pdf]

**Table S7: Difference in Outcomes for Induced and Self-Selected Innovators by GPA**

|                               | (1)<br>Submission | (2)<br>Average Ranking | (3)<br>Average Ranking<br>Conditional on Submitting |
|-------------------------------|-------------------|------------------------|-----------------------------------------------------|
| Induced                       | -0.067<br>(0.064) | -0.480*<br>(0.259)     | -2.068*<br>(1.085)                                  |
| Above Median CGPA             | -0.059<br>(0.059) | -0.460*<br>(0.238)     | -2.101**<br>(0.939)                                 |
| Above Median CGPA*<br>Induced | 0.084<br>(0.085)  | 0.581*<br>(0.344)      | 2.601<br>(1.473)                                    |
| Observations                  | 190               | 190                    | 17                                                  |
| R-squared                     | 0.007             | 0.024                  | 0.323                                               |
| Mean dep var                  | 0.09              | 0.332                  | 3.715                                               |

Notes: Standard errors are in parentheses. \* significant at 10%; \*\* significant at 5%; \*\*\* significant at 1%
