# Supplementary material
Source: publisher figshare collection journal article supplement (https://plos.figshare.com/articles/dataset/_/7959677)
Supplement: Supplementary file 1 [file 1 › pone.0214155.s014.pdf]

**Table S9: Effect of Encouragement Treatment by GPA**

|                     | (1)<br>Submission  | (2)<br>Average Ranking | (3)<br>Average Ranking<br>Conditional on Submitting |
|---------------------|--------------------|------------------------|-----------------------------------------------------|
| Encouragement       | 0.052<br>(0.064)   | 0.397<br>(0.256)       | 1.890*<br>(0.905)                                   |
| Above Median CGPA   | 0.052<br>(0.059)   | 0.246<br>(0.237)       | 0.675<br>(0.855)                                    |
| Above Median CGPA * | -0.139*<br>(0.084) | -0.827**<br>(0.338)    | -4.510***<br>(1.344)                                |
| Constant            | 0.073<br>(0.045)   | 0.228<br>(0.180)       | 3.110***<br>(0.715)                                 |
| Observations        | 190                | 190                    | 17                                                  |
| R-squared           | 0.018              | 0.037                  | 0.529                                               |
| Mean dep var        | 0.09               | 0.332                  | 3.715                                               |

Notes: Standard errors are in parentheses. \* significant at 10%; \*\* significant at 5%; \*\*\* significant at 1%
