# Supplementary material
Source: publisher figshare collection journal article supplement (https://plos.figshare.com/articles/dataset/_/7959677)
Supplement: Supplementary file 1 [file 1 › pone.0214155.s015.pdf]

**Table S10: Effect of Encouragement Treatment by GPA, Controls**

|                                     | (1)<br>Submission | (2)<br>Average Ranking | (3)<br>Average Ranking<br>Conditional on Submitting |
|-------------------------------------|-------------------|------------------------|-----------------------------------------------------|
| Encouragement                       | 0.067<br>(0.068)  | 0.477<br>(0.273)       | 2.490<br>(1.414)                                    |
| Above Median CGPA                   | 0.202<br>(0.096)  | 0.831<br>(0.387)       | 1.619<br>(2.239)                                    |
| Above Median CGPA*<br>Encouragement | -0.163<br>(0.092) | -0.920<br>(0.371)      | -4.488<br>(1.667)                                   |
| Observations                        | 172               | 172                    | 17                                                  |
| R-squared                           | 0.054             | 0.081                  | 0.726                                               |
| Mean dep var                        | 0.09              | 0.332                  | 3.715                                               |

Notes: Standard errors are in parentheses. All columns include controls for participant gender, cgpa, year of study, whether or not they major in computer science or electrical engineering, and whether or not they have prior innovation contest experience.
