# Supplementary material
Source: publisher figshare collection journal article supplement (https://plos.figshare.com/articles/dataset/_/7959677)
Supplement: Supplementary file 1 [file 1 › pone.0214155.s016.pdf]

**Table S11: Difference in Outcomes for Induced and Self-Selected Participants by Encouragement and GPA**

|                    | (1)<br>Submission   | (2)<br>Average Ranking | (3)<br>Average Ranking<br>Conditional on Submitting |
|--------------------|---------------------|------------------------|-----------------------------------------------------|
| Induced            | 0.028<br>(0.092)    | -0.106<br>(0.366)      | -2.835*<br>(1.494)                                  |
| Encouragement      | 0.152<br>(0.096)    | 0.776**<br>(0.382)     | 0.083<br>(1.364)                                    |
| Above Median CGPA  | 0.055<br>(0.085)    | 0.101<br>(0.339)       | -1.543<br>(1.364)                                   |
| Encouragement *    | -0.191<br>(0.129)   | -0.742<br>(0.515)      | 2.418<br>(2.023)                                    |
| Induced            | 0.000<br>(0.121)    | 0.314<br>(0.484)       | 3.600*<br>(1.761)                                   |
| Above Median CGPA* | -0.235**<br>(0.118) | -1.140**<br>(0.474)    | -2.541<br>(1.929)                                   |
| Encouragement      | 0.177<br>(0.171)    | 0.563<br>(0.683)       | -2.853<br>(2.818)                                   |
| Above Median CGPA* | 0.059<br>(0.069)    | 0.294<br>(0.278)       | 5.000***<br>(1.220)                                 |
| *Induced           |                     |                        |                                                     |
| Constant           |                     |                        |                                                     |
| Observations       | 190                 | 190                    | 17                                                  |
| R-squared          | 0.036               | 0.068                  | 0.684                                               |
| Mean dep var       | 0.0895              | 0.332                  | 3.715                                               |

Notes: Standard errors are in parentheses. \* significant at 10%; \*\* significant at 5%; \*\*\* significant at 1%
