# Supplementary material
Source: publisher figshare collection journal article supplement (https://plos.figshare.com/articles/dataset/_/7959677)
Supplement: Supplementary file 1 [file 1 › pone.0214155.s017.pdf]

**Table S12: Survey Outcomes by Induced Participants and Encouragement Treatment**

|               | (1)<br>Any Effort on<br>Contest | (2)<br>No Submission<br>due to Time | (3)<br>No Submission<br>due to Challenge |
|---------------|---------------------------------|-------------------------------------|------------------------------------------|
| Induced       | -0.040<br>(0.122)               | -0.058<br>(0.152)                   | 0.023<br>(0.154)                         |
| Encouragement | -0.081<br>(0.119)               | 0.304**<br>(0.143)                  | 0.004<br>(0.145)                         |
| Observations  | 72                              | 59                                  | 59                                       |
| R-squared     | 0.063                           | 0.124                               | 0.066                                    |
| Mean dep var  | 0.684                           | 0.470                               | 0.409                                    |

Notes: Standard errors are in parentheses. All columns include controls for participant gender, cgpa, year of study, whether or not they major in computer science or electrical engineering, and whether or not they have prior innovation contest experience.
